# Supplementary material for: Erfassung unmittelbarer affektiver Reaktionen auf körperliche Aktivität
Source: Atypon-hosted journal article supplement (doi:10.1026/1612-5010/a000291), 2020-01-01
Supplement: 1612-5010_a000291_esm1.pdf [file 1612-5010_a000291_esm1.pdf]

# ESM 1: FEELING SCALE

Während körperlicher Aktivität ist es üblich, dass man Stimmungsveränderungen erlebt. Einige Menschen finden körperliche Aktivität angenehm, während andere sie als unangenehm empfinden. Darüber hinaus kann das Befinden mit der Zeit schwanken. Das bedeutet, man kann sich während der körperlichen Aktivität mehrmals gut oder schlecht fühlen.

*Wissenschaftler haben diese Skala entwickelt, um diese Veränderungen des Befindens zu messen.*

*Beurteilen Sie hier, wie Sie sich derzeit im Allgemeinen fühlen.*

|           |                      |
|-----------|----------------------|
| <b>+5</b> | <b>Sehr gut</b>      |
| <b>+4</b> |                      |
| <b>+3</b> | <b>Gut</b>           |
| <b>+2</b> |                      |
| <b>+1</b> | <b>Eher gut</b>      |
| <b>0</b>  | <b>Neutral</b>       |
| <b>-1</b> | <b>Eher schlecht</b> |
| <b>-2</b> |                      |
| <b>-3</b> | <b>Schlecht</b>      |
| <b>-4</b> |                      |
| <b>-5</b> | <b>Sehr schlecht</b> |

Diese ESM bezieht sich auf die Originalarbeit „Maibach, M., Niedermeier, M. Sudeck, G. & Kopp, M. (2020). Erfassung unmittelbarer affektiver Reaktionen auf körperliche Aktivität: Eine Validierungsstudie für deutschsprachige Versionen der Feeling Scale und der Felt Arousal Scale. Zeitschrift für Sportpsychologie, 27, 4-12.“. Die ESM wurde im Oktober 2023 dem Artikel hinzugefügt.
