# Supplementary material for: Erfassung unmittelbarer affektiver Reaktionen auf körperliche Aktivität
Source: Atypon-hosted journal article supplement (doi:10.1026/1612-5010/a000291), 2020-01-01
Supplement: 1612-5010_a000291_esm2.pdf [file 1612-5010_a000291_esm2.pdf]

## ESM 2: FELT AROUSAL SCALE

Beurteilen Sie hier, wie aktiviert Sie sich derzeit fühlen.

Mit "aktiviert" ist gemeint, wie "aufgebracht" oder "angespannt" Sie sich fühlen.

Sie können hohe Aktivierung in einer von einer Vielzahl von Möglichkeiten erleben, beispielsweise als Aufregung, Angst oder Ärger.

Niedrige Aktivierung kann von Ihnen ebenfalls in einer von einer Reihe von Möglichkeiten erlebt werden, beispielsweise als Entspannung, Langeweile oder Gelassenheit.

- 1**            **Niedrige Aktivierung**
- 2**
- 3**
- 4**
- 5**
- 6**            **Hohe Aktivierung**

Diese ESM bezieht sich auf die Originalarbeit „Maibach, M., Niedermeier, M. Sudeck, G. & Kopp, M. (2020). Erfassung unmittelbarer affektiver Reaktionen auf körperliche Aktivität: Eine Validierungsstudie für deutschsprachige Versionen der Feeling Scale und der Felt Arousal Scale. Zeitschrift für Sportpsychologie, 27, 4-12.“. Die ESM wurde im Oktober 2023 dem Artikel hinzugefügt.
